# Supplementary material
Source: publisher figshare collection journal article supplement (https://tandf.figshare.com/ndownloader/files/13513646)
Supplement: Supplementary file 1 [file 13513646]

**TRES-PAP-2018-0651.R1 Note to Production**

This paper has supplemental material that should be included in FigShare.

The authors refer to this simply as “Appendix” 1 or 2 or whatever. It would be helpful if this were amended so that the reader is referred to the FigShare location.
